# Supplementary material for: Noncoding RNAs improve the predictive power of network medicine
Source: PubMed Central journal article supplement — Proc Natl Acad Sci U S A. 2023 Oct 31;120(45):e2301342120. doi: 10.1073/pnas.2301342120 (PMC10636370; doi:10.1073/pnas.2301342120), 2023-10-31
Supplement: pnas.2301342120.sapp.pdf [file pnas.2301342120.sapp.pdf]

1 **Supplemental Information**

2 **Non-Coding RNAs Improve the Predictive Power of Network Medicine**

3 Deisy Morselli Gysi and Albert-László Barabási

4  
5  
6  
7  
8  
9  
10  
11  
12  
13  
14  
15  
16  
17  
18

19 **Table of Contents**

20       **1 Non-Coding RNAs: A Short Review..... 2**

21       **2 Database Construction ..... 5**

22           2.1 Non-coding RNA Databases..... 5

23           2.2 Gene Disease Databases..... 7

24           2.3 Degree Distribution ..... 9

25       **3 Gene Co-expression Networks ..... 10**

26       **4 The effect on non-coding RNAs in Drugs ..... 11**

27       **5 Tables..... 14**

28       **6 Figures..... 17**

29       **7 References..... 26**

30

## 31 1 NON-CODING RNAS: A SHORT REVIEW

32 The non-coding RNAs (ncRNAs) are responsible for different biological functions, such  
33 as the maintenance of gene expression. In brief, gene expression relies on DNA as a template  
34 for RNAs which then migrate to the cytoplasm, where they are translated into proteins. Yet,  
35 not all RNAs will be translated into proteins, and many ncRNAs are needed for diverse cell  
36 functions<sup>1</sup>.

37 The **small nuclear RNAs (snRNAs)** are mainly involved with the mRNA splicing,  
38 Transfer RNAs (tRNAs) are the decoders from mRNAs into peptides or proteins, they recognize  
39 three nucleotide sequences in the mRNA (codons) and recruit amino acids in the same  
40 sequence to ribosomes; Ribosomal RNAs (rRNAs), the most abundant RNA molecules in the  
41 cell, are the building blocks for ribosomes, essential for protein translation (housekeeping  
42 RNAs). Some housekeeping RNAs can carry modifications, added by small nucleolar RNAs  
43 (snoRNAs)<sup>2</sup>. **Small double-stranded RNAs (dsRNAs)** are known to mediate post-  
44 transcriptional gene silencing of mRNAs, by a process known as RNA interference (RNAi)<sup>3</sup>.  
45 Additionally, some ncRNAs were also discovered to be involved in regulatory processes such as  
46 micro RNAs (miRNAs), piwi-associated RNAs (piRNAs), and small interfering RNAs (siRNAs).

47 **MicroRNAs (miRNAs)** are a family of small nonprotein coding RNAs, that contain ~ 22  
48 nucleotides<sup>4</sup>, and function as important regulators of gene expression (activating or repressing  
49 their translation<sup>4,5</sup>, and mainly act at the post-transcriptional level<sup>6</sup>A mature miRNA can  
50 recognize their mRNA targets by base-pairing the seed region (2-8 of the miRNA nucleotides)  
51 to the complementary region on the targeted mRNA<sup>7</sup>. Each miRNA can have hundreds of

52 targets and has been estimated that the human genome has more than 1000 miRNAs and  
53 about 10 to 30% of all human genes may be regulated by miRNAs<sup>8</sup>. One can use Argonaute  
54 (AGO) immunoprecipitation followed by high-throughput sequencing, termed AGO CLIP-seq,  
55 to examine the association between miRNA and mRNAs in a very specific manner<sup>9,10</sup>.  
56 However, this technique does not provide a direct linkage between miRNA and its mRNAs  
57 targets, but it uses as an intermediate the argonaute protein (AGO), which binds to miRNAs.  
58 To overcome this issue, a new technology called CLASH (crosslinking, ligation, and sequencing  
59 of hybrids) has been proposed<sup>11</sup>, which ligates the 5' end of an AGO-bound miRNA to the 3'  
60 end of an AGO-bound mRNA, and as consequence, it provides direct linkage information of the  
61 two RNAs<sup>12,13</sup>. Because miRNAs function in a similar manner as Transcription Factors (TF), they  
62 have an intertwined and well-regulated network<sup>14</sup> that can contribute to disease  
63 development<sup>15</sup> such as asthma<sup>16</sup> and schizophrenia<sup>17</sup>, when mutated or dysregulated miRNAs  
64 are highly associated with lack of function, such as neurogenesis<sup>18</sup>.

65 **PIWI-interacting RNAs (piRNAs)**, were discovered from germlines, and are a little bit  
66 longer than miRNAs (24-32 nucleotides), piRNAs originate from single-strand RNAs, as  
67 opposed to miRNAs that originate from double-stranded RNAs and require post-processing.  
68 piRNAs act by directly cleaving mRNAs<sup>19</sup>. Until 2018 more than 8 million piRNAs have been  
69 discovered in humans<sup>20</sup>. Similarly, **small interfering RNA (siRNA)**, like miRNAs, are part of the  
70 RNAi class. Those are double-stranded ncRNAs with ~ 20-25 nucleotides and they are involved  
71 with the cell defense against undesired transcripts<sup>21</sup> and external invasion<sup>22</sup> and probably being  
72 our first biological mechanism that acted as the immune system<sup>22</sup>. siRNAs are highly  
73 sequence-specific, and in theory, can silence any disease-related genes, by mediating targeted

74 mRNA. Given that, three drugs using siRNAs have been already approved to treat hereditary  
75 amyloidogenic transthyretin and acute hepatic porphyria diseases<sup>22,23</sup> and several others are in  
76 clinical trials for hemophilia, acute kidney injury, and others are being studied for IBD<sup>24</sup> and  
77 Ocular Diseases<sup>25</sup>; for a review see <sup>26</sup>.

78 **Long non-coding RNAs (lncRNA)** are a family of nonprotein coding RNAs that exceed  
79 200 nucleotides<sup>27</sup>, present a poly-A tail, similar to mRNAs, and have potential to be spliced.  
80 Even though only a small number has been well-characterized<sup>28</sup>, it is known that lncRNAs are  
81 involved in a wide range of biological functions, such as X-chromosome inactivation<sup>29,30</sup>,  
82 imprinting<sup>31,32</sup>, they can act as Gene Regulatory Factors (GRFs), and interact with one or more  
83 proteins<sup>33-35</sup>, they also can bind to chromatin<sup>36</sup>, enhancers<sup>37</sup> and act as sponges for miRNA<sup>38</sup>.  
84 Moreover, lncRNAs are associated with multiple diseases<sup>39</sup>, including different types of  
85 cancers<sup>40</sup>, autoimmune neuropathies<sup>41</sup>, and neurodegenerative diseases<sup>41</sup>. Due to their  
86 function as GRF, lncRNAs can physically interact with proteins, and the measurement of the  
87 physical binding started by the low-throughput assays such as RNA electrophoretic mobility  
88 shift assay<sup>42</sup>, RNA pull-down assay<sup>43</sup>, oligonucleotide-targeted RNase H protection assay<sup>44</sup>,  
89 and FISH co-localization<sup>45</sup>. However, these methods offer only limited information, mainly due  
90 to the many-to-many bindings that occur between proteins and RNAs. Nowadays, several  
91 different high-throughput methods exist, that can be classified into protein-focused and RNA-  
92 focused<sup>28</sup>. The protein-focused focus is on the binding of RNAs to a protein of interest and can  
93 be further classified into *in vitro* or *in vivo*. In the *in vitro* approaches, RNA libraries are tested  
94 against a protein, and high-affinity RNAs are isolated after rounds of selection. In the *in vivo*  
95 methods, RNAs bound to the protein of interest in a sample are pulled down using variants of

96 immunoprecipitation techniques. In RNA-focused approaches, the goal is to identify all  
97 proteins bound to an RNA of interest. For a review with a complete description and  
98 comparison of the methods, see <sup>28</sup>. Of note, the lncRNA CRNDE has been identified as a  
99 promising target for the therapeutic treatment of prostate cancer by targeting miR-146a-5p<sup>46</sup>.

100

## 101 **2 DATABASE CONSTRUCTION**

### 102 **2.1 NON-CODING RNA DATABASES**

103 We combine data from nine publicly available datasets that compile experimentally  
104 validated non-coding interactions. We describe each dataset, its data, and its normalization  
105 procedure. Table S 1 details their gene composition and interactions.

106 **DIANA Tools**<sup>47</sup> ranges from target prediction algorithms to databases of  
107 experimentally verified miRNA targets on coding and non-coding RNAs. In total it provides  
108 91,249 interactions between 12,254 genes (10,087 proteins, 2,167 ncRNAs).

109 **lncBook**<sup>48</sup> carries information on lncRNAs, from functions, and associations to diseases  
110 and interactions from lncRNAs to other elements (proteins and miRNAs). The interactions are  
111 experimentally validated or predicted. In total, the database provides 21 interactions between  
112 30 ncRNAs.

113 **lncRNome**<sup>49</sup> is a knowledge graph on human lncRNAs and provides predicted and  
114 experimentally validated interactions from lncRNAs and other RNAs. We only retrieved the  
115 database of experimentally validated targets, which offers information about 978 interactions  
116 between 521 genes (130 proteins, 391 ncRNAs).

117 **mirTARbase**<sup>50,51</sup> is a collection of experimentally validated miRNAs and their targets,  
118 validated by reporter assay, western blot, microarray, and next-generation sequencing  
119 experiments. After gene name conversion, it provides 6,667 interactions between 3,022 genes  
120 (2,511 proteins, 511 ncRNAs).

121 **miRecords**<sup>52</sup> is a manually curated database of experimentally validated miRNA-target  
122 interactions. It provides 975 validated interactions between 818 genes (651 proteins, 167  
123 ncRNAs).

124 **miRNet**<sup>53</sup> aggregates information from miRTarBase v8.0, TarBase v8.0, and miRecords  
125 and allows for the selection of experimentally validated miRNA-targets. In total miRNet  
126 provides 2,546 interactions between 1,264 genes (917 proteins, 347 ncRNAs).

127 **NPinter4**<sup>54</sup> contains only experimentally validated interactions from ncRNA to DNA,  
128 TF, proteins, and other RNAs using CLIP-seq, AGO CLIP-seq, ChIRP-seq, and literature-mined  
129 interactions. For humans, it provides binding information for 1,153 interactions between 1,023  
130 genes (538 proteins, 485 ncRNAs)

131 **RAIN**<sup>55</sup> contains experimentally validated and predicted interactions. Here we  
132 considered only experimentally validated interactions with a confidence score higher than 0.15  
133 (as suggested by the authors), resulting in 391,209 interactions between 16,244 genes (13,271  
134 proteins, 2,973 ncRNAs)

135 **RISE**<sup>56</sup> focuses on RNA-RNA interactions, which come from transcriptome-wide  
136 sequencing-based experiments such as PARIS, SPLASH, LIGRseq, and MARIO, and targeted  
137 studies like RIAseq, RAP-RNA, and CLASH. RISE also aggregates data from other databases

138 with experimental validation, 64,084 validated interactions between 20,660 genes (15,559  
139 proteins, 5,101 ncRNAs).

140 Note that, during the construction of the PPI some databases reported protein and  
141 ncRNA binds, we included those interactions only in the NCI. The Table S 1 provides a  
142 complete overview of how many genes and interactions exist in each final database, along with  
143 the number of experimentally validated interactions present in each network.

## 144 2.2 GENE DISEASE DATABASES

145 To link genes to diseases, we rely on several databases. We start by normalizing gene  
146 and disease names. A description of the gene-disease association in each database is  
147 presented in Table S 4.

148 **ClinGen**<sup>57</sup> is a worldwide effort to associate genes with diseases along with data  
149 curation from a panel of experts. Although it provides different levels of evidence, for each  
150 entry we focused only on the ones with strong or weak evidence. Overall, it accounts for 523  
151 associations from 446 genes and 138 diseases.

152 **ClinVar**<sup>58</sup> reports relationships among human variations and phenotypes, with  
153 supporting evidence. It accounts for 6,769 associations between 3,847 genes and 917 diseases.

154 The **Comparative Toxicogenomics Database (CTD)**<sup>59</sup> is a well-established database of  
155 chemicals, genes, phenotypes, exposures, and diseases. All its 24,857 entries are annotated  
156 with publication information, allowing for transparency and for tracing any of its 7,327 genes  
157 and 7,711 diseases.

158 **Disease Enhancer**<sup>60</sup> is a manually curated database, based on literature, for disease-  
159 associated enhancers. It provides 518 associations between 303 genes and 121 diseases.

160 **DisGeNet**<sup>61,62</sup> integrates expert-curated databases with text-mined data and covers  
161 information on Mendelian and complex diseases. Here, we focus only on the curated databases  
162 based on genes or variants. The gene-based data source contains 36,317 associations, from  
163 8,912 genes to 2,099 diseases.

164 **GWAS catalogue**<sup>63</sup> combines information across multiple GWAS studies extracted  
165 from literature and goes through a double curation process, where only associations with  
166 sufficient evidence are kept. We removed inferred and imputed SNPs and retrieved 8,957  
167 associations, between 4,254 genes and 434 diseases.

168 **HMDD**<sup>64</sup>, **Human microRNA Disease Database**, focuses only on the association of  
169 miRNAs and diseases. Its data is experimentally validated through miRNA circulation, tissue  
170 differential expression, genetics, epigenetics, or targeted analysis. HMDD accounts for 13,662  
171 associations between 916 miRNAs and 622 diseases.

172 **LncBook**<sup>48</sup>, used in the construction of the NCI, also provides information on lncRNAs'  
173 associations with diseases. It contains 1,478 associations between 669 genes and 246 diseases.

174 **lncRNADisease**<sup>65,66</sup> is a knowledge base that focuses on associations between diseases  
175 and lncRNA, it provides different levels of evidence for its associations. In our study, we focus  
176 on 3,146 associations with experimental evidence between 1,533 genes and 286 diseases.

177 **Leiden Open Variation Database (LOVD)**<sup>67</sup> is an integrative project connecting expert-  
178 curated variants and genes with multiple phenotypes. LOVD includes 2,931 associations from  
179 2,113 genes to 664 diseases.



180 **Monarch** is an integrative project that connects phenotypes and genotypes in several  
181 species. It does provide experimental evidence for part of its results and includes text-mining  
182 information. In total, provides 19,542 associations between 8,059 genes and 1,058 diseases.

183 **Online Mendelian Inheritance in Man (OMIM<sup>68</sup>)** is a continuous catalog of human  
184 genes and traits, with a focus on the molecular relationship between genetic variation and  
185 phenotype. OMIM includes 3,517 associations based on peer-reviewed biomedical literature  
186 from 2,578 genes to 751 diseases.

187 **Orphanet** is a manually-curated database that focuses on experimentally validated  
188 associations from rare diseases to genes. It contains 3,787 associations from 2,555 genes to 721  
189 rare diseases.

190 **PheGeni<sup>69</sup>** is the Phenotype-Genotype Integrator from NCBI and combines multiple of  
191 its hosted databases (such as Gene, dbGaP, OMIM, eQTL, and dbSNP). From this integrator,  
192 we retrieved 11,232 associations from 5,929 genes and 485 diseases.

193 **Psygenet<sup>70</sup>** is a database that focuses on psychiatric disorders. A gene is associated  
194 with a disease if it plays a role in the disease pathogenesis or is a marker for the disease. For  
195 that, the associations are identified using a text-mining tool, and later manually curated. It  
196 provides 2,924 associations between 1,324 genes in 40 mental disorders.

197

198

### 199 2.3 DEGREE DISTRIBUTION

200 We analyzed the degree distribution of the PPI and the PPI & NCI networks, following  
201 the methodology defined in <sup>71</sup>. We find that while the inclusion of the NCI does not affect the  
202 power law nature of the network, it does alter the degree exponent, which is crucial for  
203 determining the properties of the network. Specifically, we find that the degree exponent for  
204 the PPI & NCI network is  $\gamma_{PPI \& NCI} = 2.54$ , less than the degree exponent for the PPI  
205 network,  $\gamma_{PPI} = 2.71$ . We also calculate  $\gamma$  for each element type and present its results on  
206 Table S 6. We find that Protein Coding Genes behave differently than TFs in the PPI & NCI  
207 network. This difference is important because a  $\gamma < 3$  indicates a scale-free property with a  
208 diverging second moment, which has significant implications for the network robustness.

209

#### 210 **2.4 DISEASE MODULE SIGNIFICANCE**

211 Disease modules significances were calculated using both a degree preserving and a  
212 non-degree preserving randomization. Results referring to the degree preserving  
213 randomization indicate that 41 diseases are statistically significant only using the PPI, while the  
214 PPI & NCI alone finds 65 diseases with statistical significance, and 109 diseases are identified in  
215 both networks.

216

### 217 **3 GENE CO-EXPRESSION NETWORKS**

218 Gene co-expression networks are often used to shed light on the molecular  
219 mechanisms that underlie biological processes and how changes in those interactions can lead

220 to a disorder<sup>72</sup>. These networks are inferred using the association between pairwise gene  
221 expression, measured using RNAseq or microarray. The association is often derived from a  
222 correlation, such as Pearson correlation, or a transformation, such as WGCNA<sup>73</sup> or Weighted  
223 Topological Overlap (wTO)<sup>74,75</sup>, which calculates the co-expression between two genes based  
224 on their correlation normalized by their commonalities, and removes false positives. The  
225 former focuses on positive correlations, while the latter allows for the inclusion of positive and  
226 negative correlations. Here, we construct a gene co-expression network from whole blood  
227 samples provided by GTEx<sup>76</sup>, using Pearson Correlation ( $\rho$ ) and the wTO<sup>74</sup> ( $\omega$ ).

228         Using the physical networks we derived from the PPI and the PPI & NCI (iNCI), we  
229 compared the co-expression values for both the Pearson Correlation and the wTO. We  
230 observed higher co-expression values on the physical networks (PPI, iNCI, and PPI & iNCI),  
231 leading us to ask whether the co-expression weights are predictive of physical binding. We  
232 calculated the Area Under the ROC (AUROC), for both co-expression values in the three  
233 physical networks, and we find that the AUCs increased from 0.59 in the PPI to 0.63 in the iNCI  
234 and PPI & iNCI networks for  $\rho$  (Figure 4 F) and from 0.58 in the PPI to 0.63 in the iNCI and PPI &  
235 iNCI networks for  $\omega$  (Figure S 7 B).

236

## 237 **4 THE EFFECT ON NON-CODING RNAs IN DRUGS**

238         Traditionally, drug-targets are proteins, currently, there is no ncRNA in DrugBank<sup>77</sup>  
239 listed as a drug-target. Yet, some ncRNAs are used as drugs – such as Bevasiranib<sup>78</sup>, a small  
240 interfering RNA (siRNA) that targets the VEGF-A gene, currently in clinical trial for treating

241 macular degeneration and diabetic retinopathy, or Inclisiran, an LDL cholesterol lowering  
242 siRNA that targets PCSK9, the first approved ncRNA-based drug<sup>26,79</sup>.

243 Here, we explore the potential effect of ncRNAs on the drug-target network, by  
244 exploring the neighborhood of drug-targets. For that, we explore the differences in gene  
245 classes (protein-coding, TF, miRNA, lncRNA, etc) each drug-target interacts with, compared to  
246 non-drug-targets. We find that drug target proteins interact with more miRNAs, Protein-  
247 coding, and TF than proteins not targeted by drugs (Mann Whitney Test,  $p\text{-adj} < 0.05$ ; FDR  
248 corrected, Table S 7), meaning that targets are, on median, more connected to miRNAs,  
249 protein-coding and TFs than not drugged proteins.

250 We begin by evaluating the effect of ncRNAs on drug proximity. For that, we calculate  
251 the average proximity of drug targets to the RA disease module in both networks. We first  
252 focus on three drugs used to treat RA: Adalimumab, Abatacept, and Penicillamine.  
253 Adalimumab targets the TNF gene which is also located in the RA disease module. In other  
254 words, both the PPI or the PPI & NCI disease modules already embed this gene in its network,  
255 meaning its average proximity is already zero. Abatacept, in turn, targets CD80 and CD86 in  
256 the PPI. The average proximity of those genes to the RA disease module is 2.34 in the PPI and  
257 2.11 in the PPI & NCI, indicating that by adding non-coding interactions, we observe a  
258 reduction of the proximity values. Penicillamine targets only the gene SLCO1B1, having  
259 average proximity of two in the PPI, while the distance decreases to one in the PPI & NCI  
260 (Figure S 10 A). We next test the change in distance for all drugs indicated for RA in Drug Bank,  
261 finding that the average proximity reduces its proximity values from PPI to PPI & NCI. In other

262 words, the inclusion of ncRNAs into the interactome reduces the distance between drug-  
263 targets and disease modules.

264 Even though the correlation between the proximity in the PPI and the PPI & NCI  
265 networks is high ( $\rho = 0.97$ ), we still find a significant reduction of the average proximity in  
266 drugs indicated for RA the PPI & NCI ( $p < 0.01$ ; Mann-Whitney's test). We next compare the  
267 average proximity between drugs indicated for RA compared to drugs without official  
268 indication for RA, finding that the proximity is statistically smaller for RA-indicated drugs than  
269 the ones not indicated to treat RA (Wilcoxon test;  $p < 0.01$ , (Figure S 10 B), both in the PPI and  
270 the PPI & NCI. Meaning that drugs used to treat RA are, on median, closer to the disease  
271 module than drugs not indicated for the RA treatment, in both PPI and PPI & NCI.

272

273 **5 TABLES**

274 Table S 1 **Descriptive of Databases Genes and Reported Binding Experimental Interactions.** Gene names were normalized  
 275 to Gene Symbols and if no official name was found the gene was removed from the final database along with all its  
 276 interactions. We kept only experimentally validated interactions and classified the interactions according to gene type  
 277 (protein-coding - PC, non-coding – NC).  
 278

| DATABASE        | GENES |       | INTERACTIONS |           |           |
|-----------------|-------|-------|--------------|-----------|-----------|
|                 | NC    | PC    | NC <-> NC    | PC <-> NC | PC <-> PC |
| APID            | 411   | 15930 | 32           | 3151      | 169730    |
| BIOGRID         | 616   | 15308 | 31           | 9883      | 194221    |
| BIOPLEX         | 386   | 13547 | 177          | 3912      | 104600    |
| COFRAC          | 19    | 2959  | 3            | 205       | 13689     |
| DIANA           | 2167  | 10087 | 15189        | 76060     | 0         |
| DIP             | 2     | 1389  | 1            | 1         | 1285      |
| ENCODE          | 1229  | 13808 | 1412         | 101569    | 23473     |
| HI-UNION        | 165   | 8882  | 17           | 1703      | 61969     |
| HINT            | 320   | 14576 | 66           | 2528      | 116789    |
| HIPPIE          | 100   | 8520  | 17           | 1437      | 121691    |
| INATEDB         | 153   | 5548  | 1            | 251       | 13378     |
| INSIDER         | 17    | 3362  | 18           | 12        | 3939      |
| INSTRUCT        | 206   | 11234 | 45           | 774       | 50456     |
| INTACT          | 56    | 4567  | 10           | 131       | 9102      |
| INTERACTOME3D   | 68    | 7327  | 108          | 135       | 15071     |
| INWEB           | 67    | 10530 | 43           | 94        | 58507     |
| KINOMENETWORKX  | 7     | 2340  | 0            | 25        | 7367      |
| LITBM17         | 20    | 6020  | 1            | 46        | 13320     |
| LNC_BOOK        | 30    | 0     | 21           | 0         | 0         |
| LNCRNOME        | 391   | 130   | 0            | 733       | 245       |
| MINT            | 42    | 4871  | 6            | 121       | 10616     |
| MIRECORDS       | 167   | 651   | 7            | 967       | 1         |
| MIRNET          | 347   | 917   | 14           | 2532      | 0         |
| MIRTARBASE      | 511   | 2511  | 51           | 6616      | 0         |
| NPINTERV4       | 485   | 538   | 210          | 860       | 83        |
| PHOSPHOSITEPLUS | 7     | 2840  | 0            | 7         | 7014      |
| PINA            | 282   | 14895 | 12           | 958       | 163068    |
| QUBIC           | 34    | 5271  | 7            | 241       | 27453     |
| RAIN            | 2973  | 13271 | 7840         | 383213    | 156       |
| RISE            | 5101  | 15559 | 2333         | 26660     | 35091     |

279 Table S 2 **Network proprieties comparison between PPI and PPI & NCI.** The PPI has smaller network diameter and average  
 280 shortest path length. The PPI & NCI, on its turn has smaller network density and transitivity.  
 281

| CHARACTERISTIC    | PPI     | PPI & NCI |
|-------------------|---------|-----------|
| DIAMETER          | 7       | 9         |
| DENSITY           | 0.00324 | 0.00316   |
| COMPONENTS        | 13      | 52        |
| TRANSITIVITY      | 0.04785 | 0.02594   |
| LARGEST CLIQUES   | 57      | 57        |
| LCC               | 18204   | 26483     |
| AV. DEGREE        | 58.13   | 83.32     |
| MEDIAN DEGREE     | 32      | 34        |
| AV. SHORTEST PATH | 2.66131 | 2.79465   |

282  
 283

284 Table S 3 **Median and interquartile ranges for each gene category in all two networks.** TFs and protein-coding genes  
 285 increase their degree median when we include the NCI in the PPI.  
 286

| GENE CATEGORY  | PPI          | PPI & NCI       |
|----------------|--------------|-----------------|
| PROTEIN-CODING | 30 [12; 64]  | 54 [20; 107]    |
| TF             | 48 [20; 102] | 90 [41; 168]    |
| LNCRNA         |              | 3 [1; 6]        |
| MIRNA          |              | 52 [16; 224.75] |
| OTHER          |              | 11 [3; 25]      |
| PSEUDOGENE     |              | 2 [1; 4]        |

287  
 288  
 289  
 290  
 291 Table S 4 **Descriptive of Databases Genes and Reported Disease Associations.** Gene names were normalized to Gene  
 292 Symbols and disease names were matched to MESH terms.  
 293

| DATABASE         | FINAL        |       |          | ORIGINAL     |        |          |
|------------------|--------------|-------|----------|--------------|--------|----------|
|                  | Associations | Genes | Diseases | Associations | Genes  | Diseases |
| CLINGEN          | 523          | 446   | 138      | 896          | 695    | 352      |
| CLINVAR          | 6,769        | 3,847 | 917      | 57,941       | 9,230  | 30,925   |
| CTD              | 24,857       | 7,327 | 1,912    | 35,997       | 8,745  | 5,806    |
| DISEASE ENHANCER | 518          | 303   | 121      | 650          | 349    | 165      |
| DISGENET (GDA)   | 36,317       | 8,912 | 2,099    | 95,959       | 10,147 | 11,181   |
| GWAS CATALOG     | 8,957        | 4,254 | 434      | 70,192       | 12,786 | 2,339    |
| HMDD             | 13,662       | 916   | 622      | 15,968       | 945    | 862      |
| LNCBOOK          | 1,478        | 669   | 246      | 1,952        | 863    | 369      |
| LNCRNA DISEASE   | 3,146        | 1,533 | 286      | 4,546        | 2,251  | 402      |
| LOVD             | 2,931        | 2,113 | 664      | 6,611        | 3,910  | 4,860    |
| MONARCH          | 19,542       | 8,059 | 1,058    | 33,549       | 11,531 | 8,593    |
| OMIM             | 3,517        | 2,578 | 751      | 12,333       | 7,132  | 7,349    |
| ORPHANET         | 3,787        | 2,555 | 721      | 8,252        | 4,324  | 3,784    |
| PHEGENI          | 11,232       | 5,929 | 485      | 24,926       | 9,635  | 1,001    |
| PSYGENET         | 2,924        | 1,354 | 40       | 3,621        | 1,493  | 108      |

294  
 295 Table S 5 **Genes with physical binding have higher co-expression in the physical networks.** Genes with a direct or indirect  
 296 physical binding (PPI, PPI & NCI, or co-regulated by a ncRNA) have, in median, higher co-expression values than genes that do  
 297 not physically interact. Kruskal-Wallis Test, Dunn's Post hoc test.  
 298  
 299

| COMPARISON               | CORRELATION |           |                | WTO       |           |                |
|--------------------------|-------------|-----------|----------------|-----------|-----------|----------------|
|                          | P           | P adj     | Kruskal-Wallis | P         | P adj     | Kruskal-Wallis |
| DIRECT - NONE            | p < 0.001   | p < 0.001 |                | p < 0.001 | p < 0.001 |                |
| INDIRECT - NONE          | p < 0.001   | p < 0.001 | p < 0.001      | p < 0.001 | p < 0.001 | p < 0.001      |
| INDIRECT + DIRECT - NONE | p < 0.001   | p < 0.001 |                | p < 0.001 | p < 0.001 |                |

300 Table S 6 **Power Law fit for each element in their respective networks.** The inclusion of the NCI does not change the PL  
 301 nature of the network, but does change the coefficients of the degree exponent for  $\gamma_{PPI} = 2.71$  to  $\gamma_{PPI \& NCI} = 2.54$ .

| NETWORK   | TYPE           | K <sub>CUT</sub> | K <sub>SAT</sub> | $\gamma$ |
|-----------|----------------|------------------|------------------|----------|
| PPI       | PPI            | 2427             | 90               | 2.71     |
|           | PPI            | 2427             | 90               | 2.71     |
|           | TF             | 1564             | 100              | 2.42     |
|           | Protein Coding | 1688             | 83               | 2.84     |
| PPI & NCI | PPI & NCI      | 3918             | 100              | 2.54     |
|           | Protein Coding | 1801             | 100              | 3.00     |
|           | TF             | 2632             | 100              | 2.43     |
|           | lncRNA         | 1618             | 1                | 1.59     |
|           | miRNA          | 4413             | 77               | 1.62     |
|           | Pseudogenes    | 123              | 1                | 1.76     |

302  
 303  
 304  
 305  
 306  
 307  
 308

Table S 7 **First Neighbors of drug-targets distribution.** Drug-Targets are more connected to miRNAs, TFs and Protein-coding Genes than non-drugged genes.

|                | DRUGGED     | NON-DRUGGED | P       | P-ADJ   |
|----------------|-------------|-------------|---------|---------|
| PROTEIN-CODING | 35 [15, 76] | 15 [4, 41]  | <0.0001 | <0.0001 |
| TF             | 9 [4, 21]   | 6 [2, 16]   | <0.0001 | <0.0001 |
| LNCRNA         | 1 [1, 2]    | 1 [1, 2]    | 0.3875  | 0.3975  |
| MIRNA          | 19 [5, 50]  | 16 [4, 43]  | <0.0001 | <0.0001 |
| PSEUDOGENE     | 1 [1, 2]    | 1 [1, 2]    | 0.3237  | 0.2590  |

309



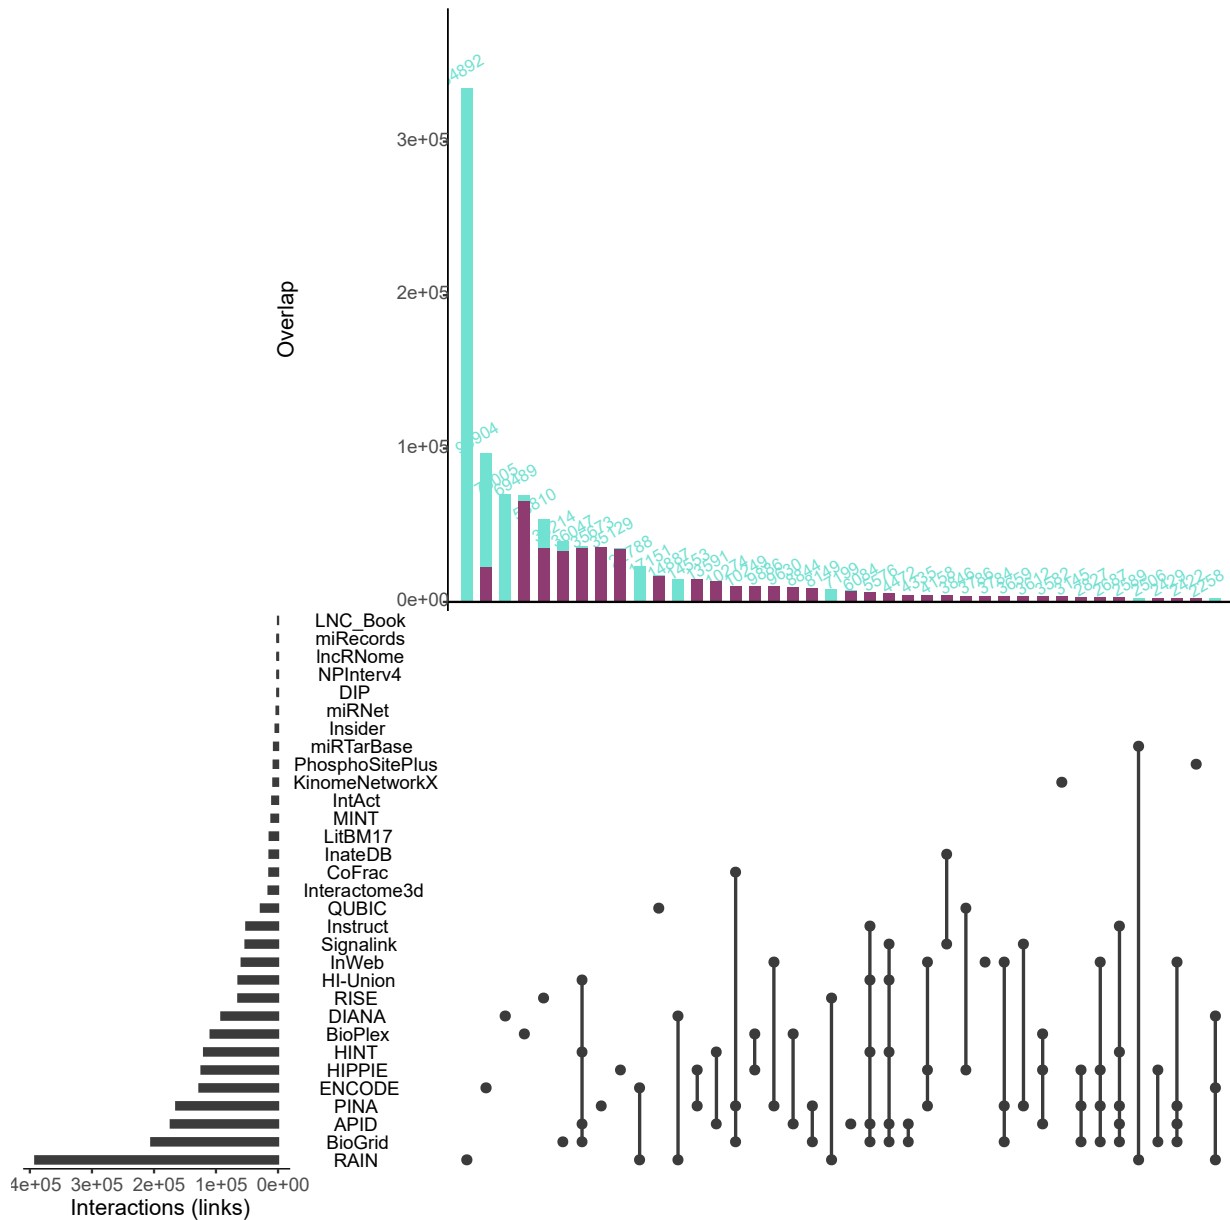

311  
 312 Figure S 1 **Network Validation: Gene-Interaction Overlap.** The upset plot depicts the number of binding interactions in each  
 313 dataset, and how it overlaps across all PPI and NCI databases. Most of the interactions are database specific and do not occur  
 314 in multiple sources, which provide us with complementary information. Interactions among proteins are represented in purple,  
 315 while interactions involving at least one ncRNA are represented in turquoise.

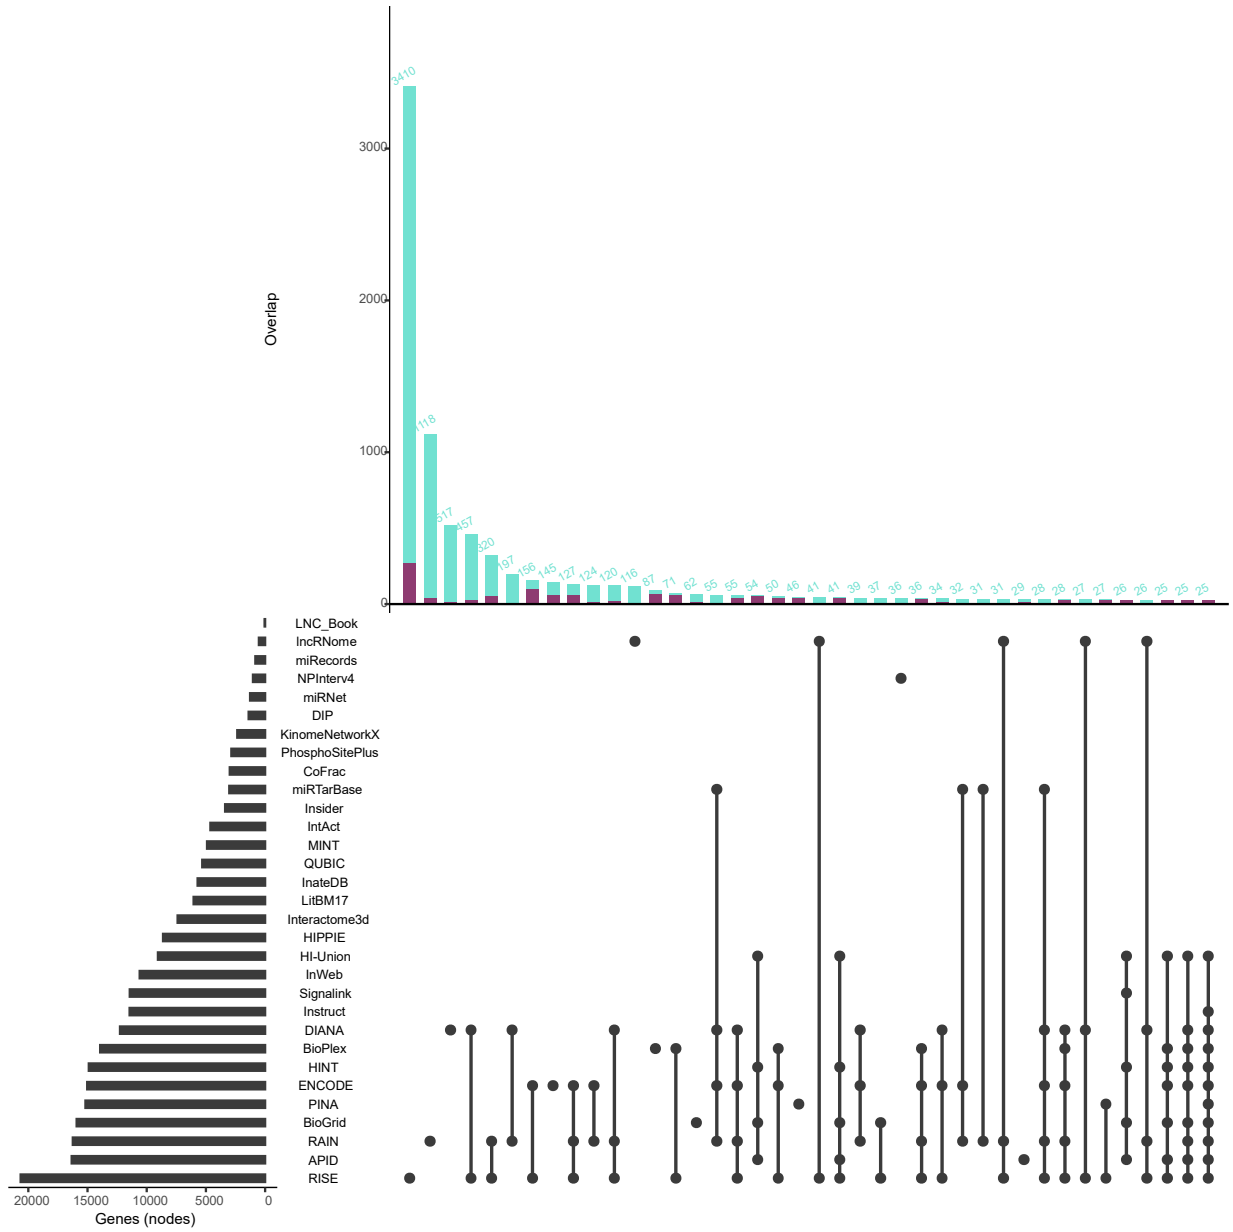

316  
317  
318  
319  
320

Figure S 2 **Network Validation: Gene Overlap**. The upset plot depicts the number of genes in each dataset, and how it overlaps across all PPI and NCI databases. Most of the genes are reported in multiple datasets. Proteins are represented in purple, while ncRNAs are represented in turquoise.

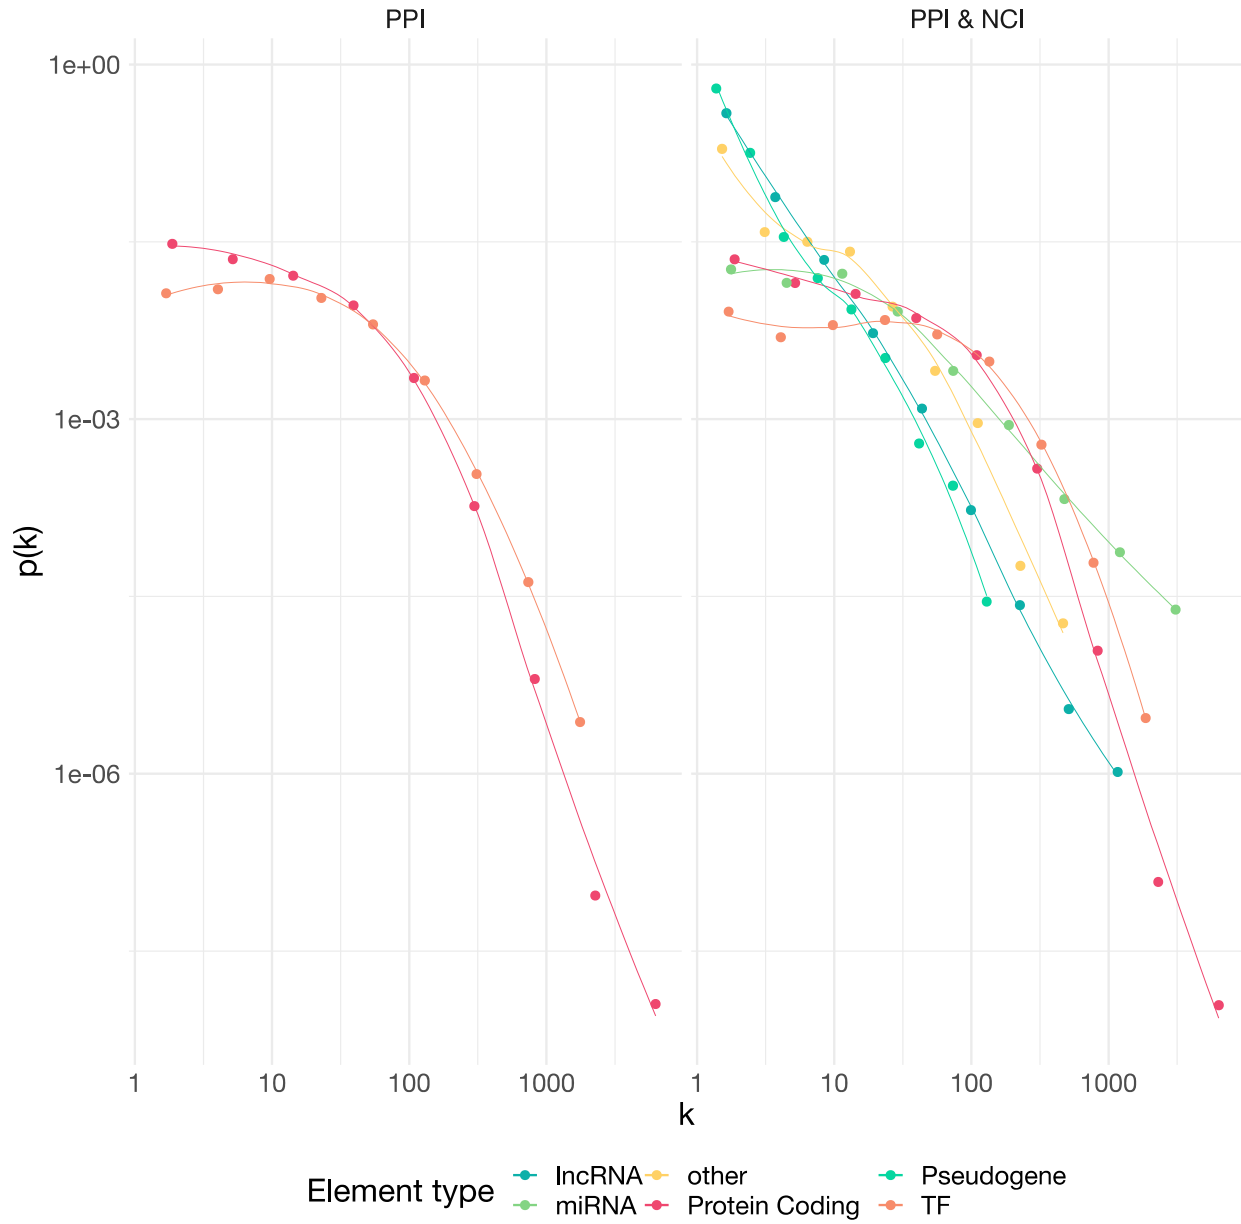

321  
 322  
 323  
 324  
 325  
 326  
 327  
 328  
 329  
 330  
 331  
 332  
 333  
 334  
 335  
 336  
 337

Figure S 3 **Degree distribution of different genomic elements.** The degree distribution on the three networks changes when we include non-coding elements into the PPI, the inclusion of miRNAs shows that they tend to have a higher degree, acting as regulatory factors and possibly as master regulators. Both PPI and PPI & NCI follow asymptotically, for high ( $k$ ), a power-law distribution. The diameter of the PPI is 7, while the diameter of the PPI & NCI is 9. Therefore, the diameter of the network increases with the NCI inclusion. Even though it might be counter intuitive, the PPI is more densely connected than the PPI & NCI. Meaning that, the inclusion of ncRNA mediated interactions more than double the number of interactions, and include more genes, creating a less dense network, where nodes are more dispersed and less closely connected.

338  
 339  
 340  
 341  
 342  
 343  
 344  
 345

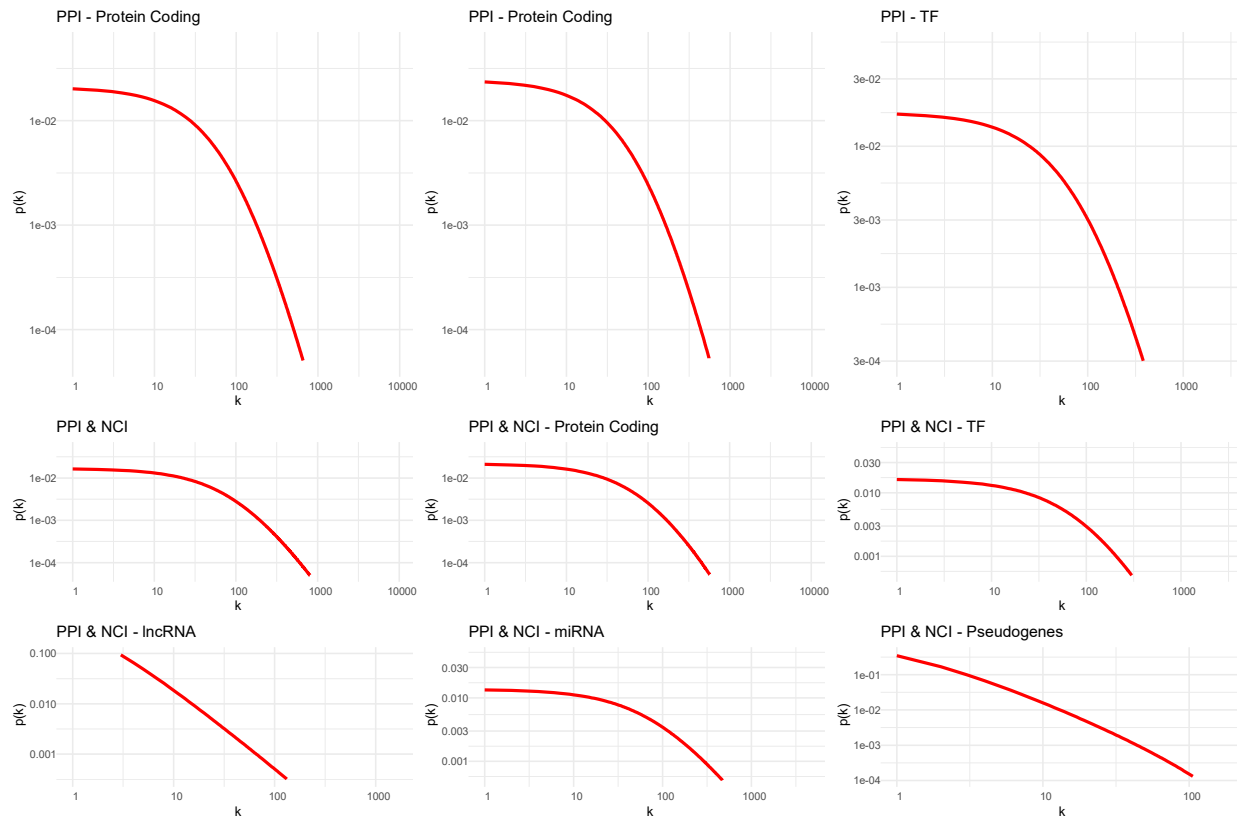

346  
 347  
 348  
 349  
 350

Figure S 4 Degree distribution and power law fit (in red) for the network-based genomic elements. The degree distribution and the power law for each genomic element was fitted independently. We fitted a Power-Law for real data as  $(k + k_{sat})^{-\gamma} e^{\frac{-k}{k_{cut}}}$ , where  $k$  is the degree,  $k_{cut}$  is defined by the low- $k$  saturation and is and  $k_{sat}$  is the large- $k$  cutoff. The identified  $k_{cut}$  and  $k_{sat}$  can be found on Table S 6.

351  
 352  
 353  
 354  
 355  
 356  
 357  
 358  
 359

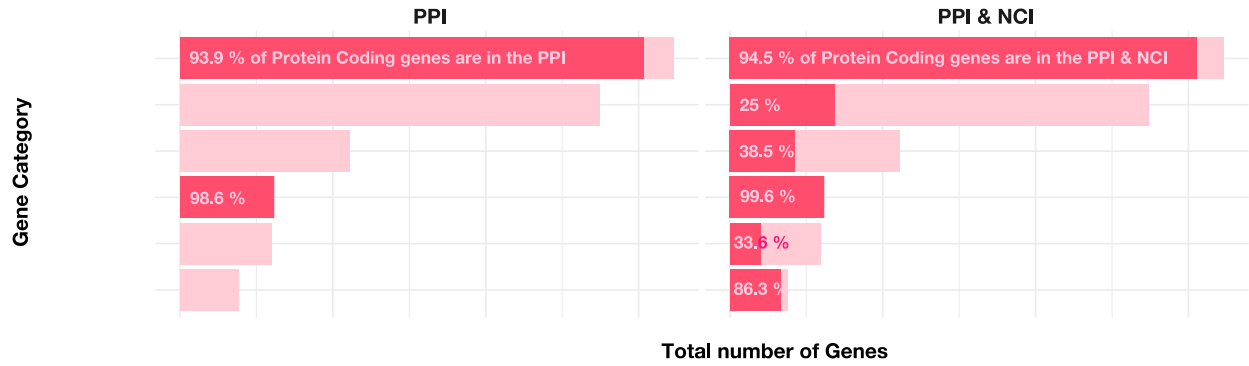

360  
361  
362  
363  
364

Figure S 5 **Gene completion mapped in the PPI and the combined network.** In the combined PPI & NCI we retrieve 86.3% of miRNAs, 99.6% of transcription factors and 38.5% of lncRNAs, increasing the interactions and coverage of the human transcriptomic.

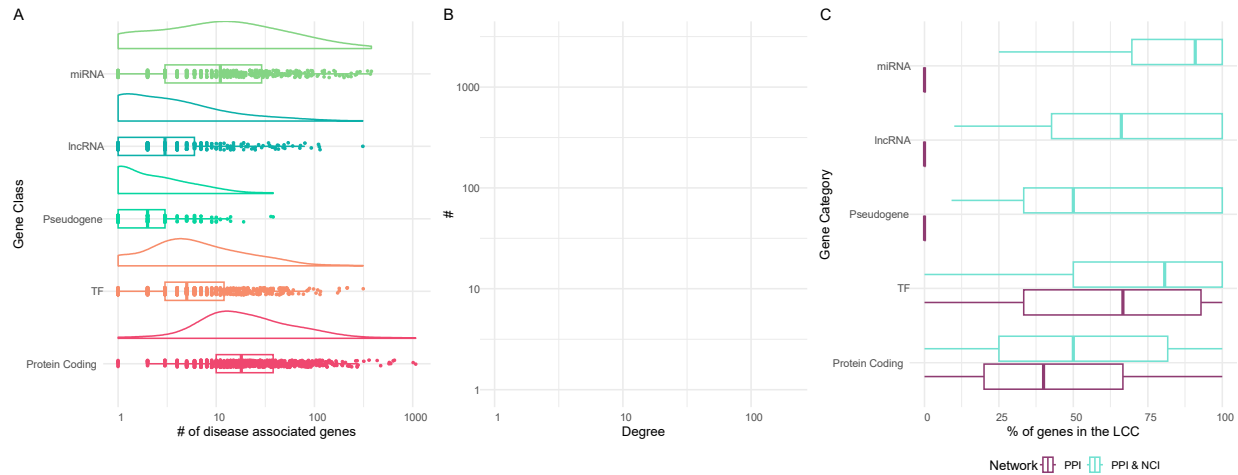

365  
 366 **Figure S 6 Disease Associated genes and their classification.** **A)** Rainplot of Number of disease-associated genes classified by  
 367 gene category. We calculate the number of disease-associated genes in each disease, for each gene category. We find that  
 368 Protein-Coding genes are the most associated with diseases, followed by miRNAs, TFs and lncRNAs. **B)** Degree distribution of  
 369 gene-disease associations. miRNAs have a fat tail, indicating that few miRNAs can be associated with multiple diseases. **C)** The  
 370 % of genes in each category found in the LCC. The inclusion of ncRNAs in the PPI allows us to increase the percentage of  
 371 protein-coding genes retrieved in the disease modules from 40 to 50%. On median, 90% of miRNAs associated with a disease  
 372 are found in the disease module.

373  
 374  
 375  
 376  
 377  
 378  
 379

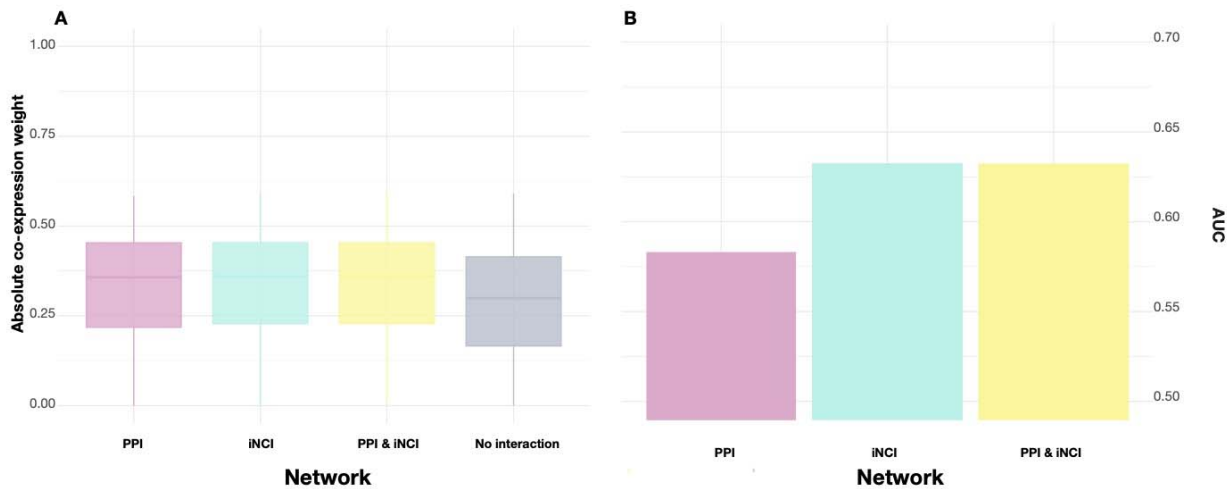

380  
 381 **Figure S 7 Absolute co-expression values (wTO) are higher in physical networks.** **A)** Genes with direct or indirect physical  
 382 binding (PPI, PPI & NCI, or co-regulated by an ncRNA) have higher co-expression values than genes that do not physically  
 383 interact in the wTO. The boxplot indicates that the absolute weighted Topological Overlap values are higher when there is  
 384 physical interaction, compared to then non-existing links, indicating an association between physical binding and strength of  
 385 co-expression. **B)** Co-Expression Networks Can Predict Physical Interactions. We use the wTO values between two transcripts  
 386 to predict a direct or indirect binding, finding that the inclusion of ncRNAs increases the AUC in the iNCI and the PPI & iNCI.

387  
 388  
 389

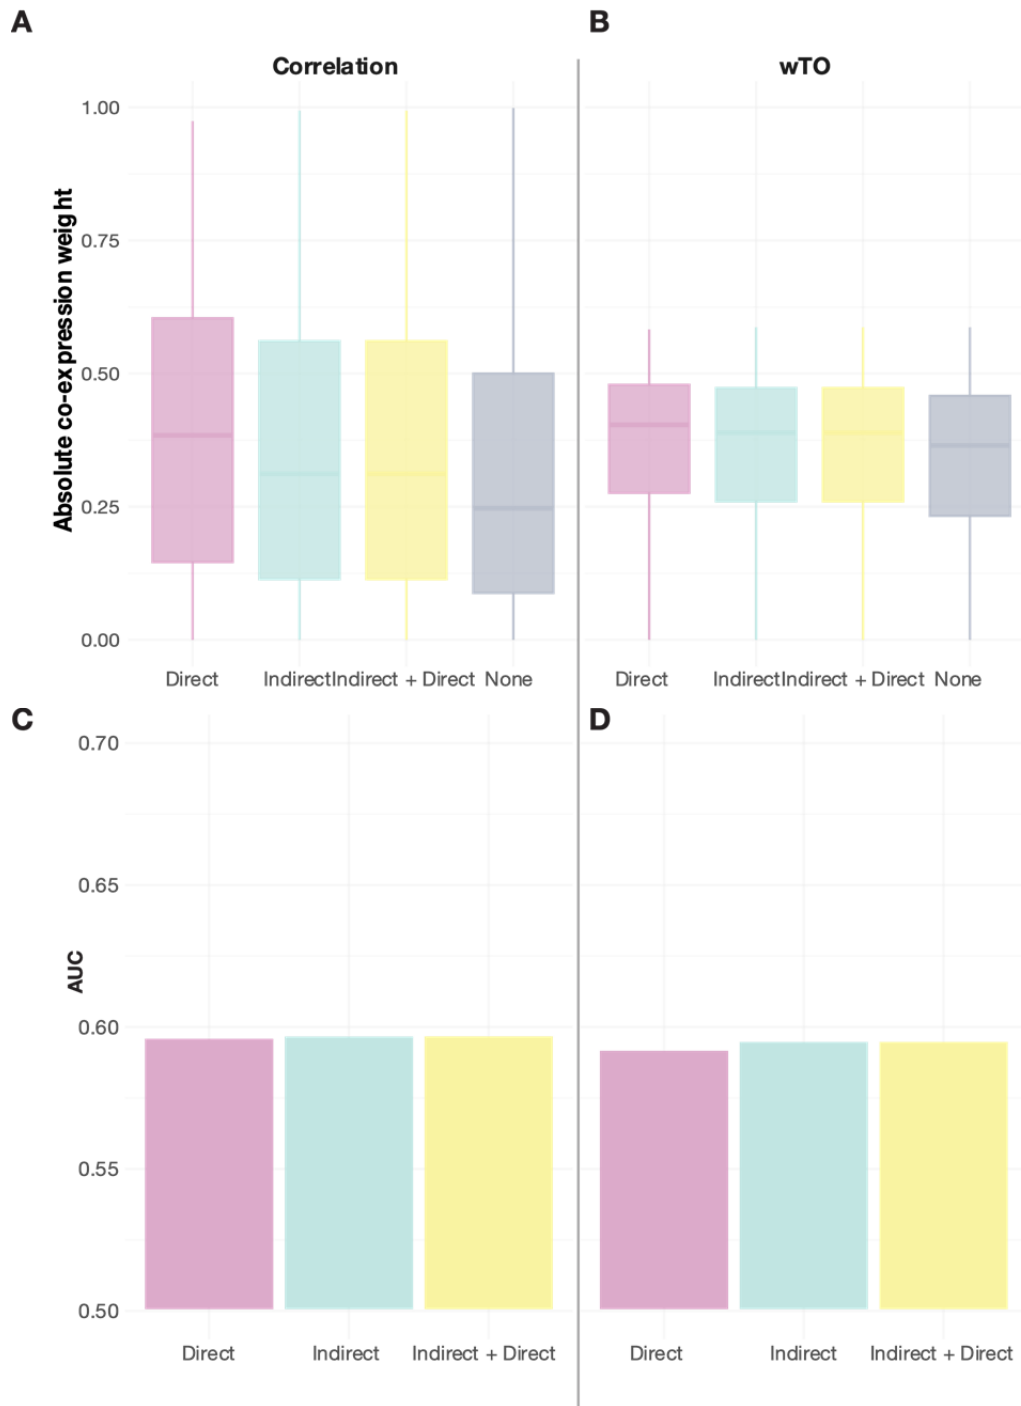

390  
 391 Figure S 8 Absolute co-expression values (correlation and wTO) are higher in TF-TF physical network and Co-Expression  
 392 Networks Can Predict TF-TF Physical Interactions. A) TFs with direct or indirect physical binding (PPI, PPI & NCI, or co-  
 393 regulated by an ncRNA) have higher co-expression values than genes that do not physically interact in the wTO. The boxplot  
 394 indicates that the absolute correlation and B) weighted Topological Overlap values are higher when there is physical  
 395 interaction, compared to then non-existing links, indicating an association between physical binding and strength of co-  
 396 expression ( $p < 0.01$ ; Kruskal-Wallis Test, Dunn's Post hoc test). C) Co-Expression Networks Can Predict Physical Interactions.  
 397 We use the correlation and D) wTO values between two TFs to predict a direct or indirect binding, finding that the inclusion of  
 398 ncRNAs slightly increases the AUC in the iNCI and the PPI & iNCI.

399  
 400  
 401

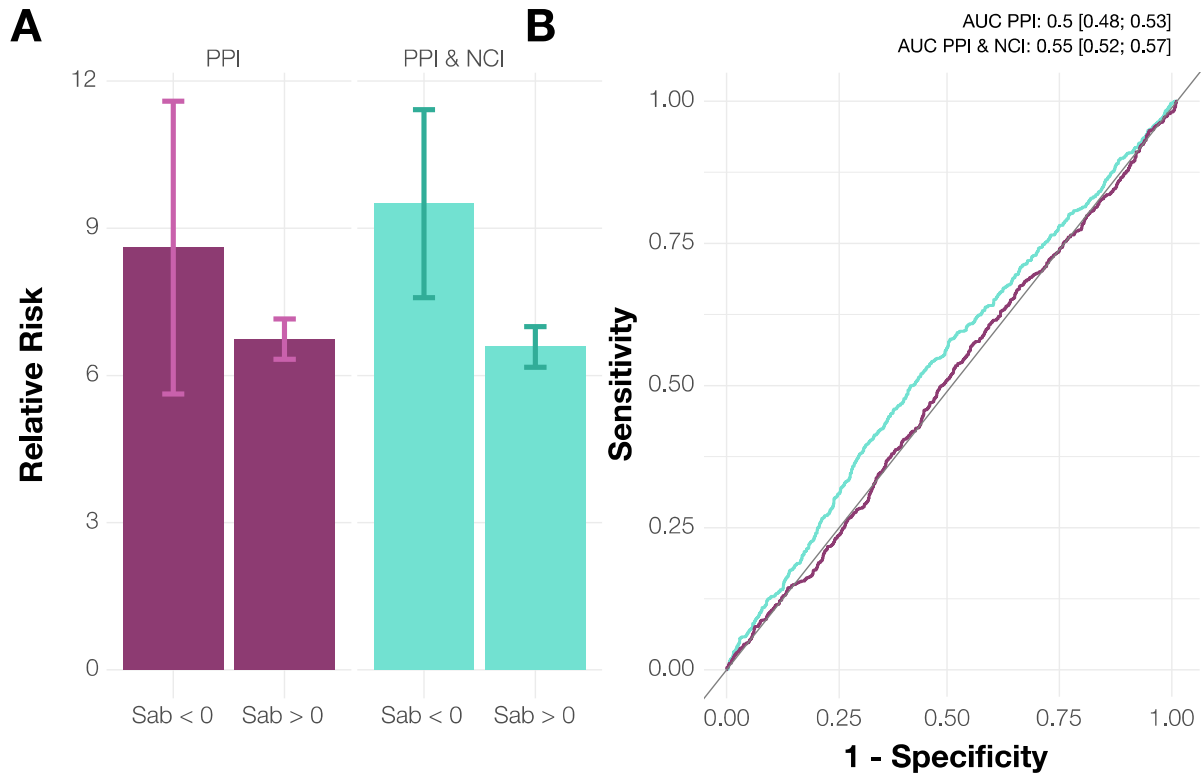

402  
403 **Figure S 9 Disease Comorbidity and their separation.** **A)** Relative Risk is significantly higher for diseases closer to each  
404 other. Diseases with a negative  $S_{ab}$  have significantly higher relative risks when compared to diseases with positive  $S_{ab}$  for  
405 both the PPI and the PPI & NCI (Wilcoxon Test,  $p < 0.05$ ). We observe for the PPI & NCI, on average, an increase on the RR of  
406 9.5 for negative  $S_{ab}$  (se 2.93), and a decrease to 6.5 (se 0.41) for positive  $S_{ab}$  (Wilcoxon Test,  $p > 0.05$ ). **B)** Network Separation  
407 is predictive of comorbidity. We use the network separation as a predictor of a significant Relative Risk  $> 1$ , finding that the PPI  
408 alone is as good as random (AUC = 0.5), while the PPI & NCI slightly increases the AUC to 0.55, even though the predictive  
409 power is still close to random, it suggests that ncRNAs might hold the key for improving disease comorbidity and progression  
410 identification.



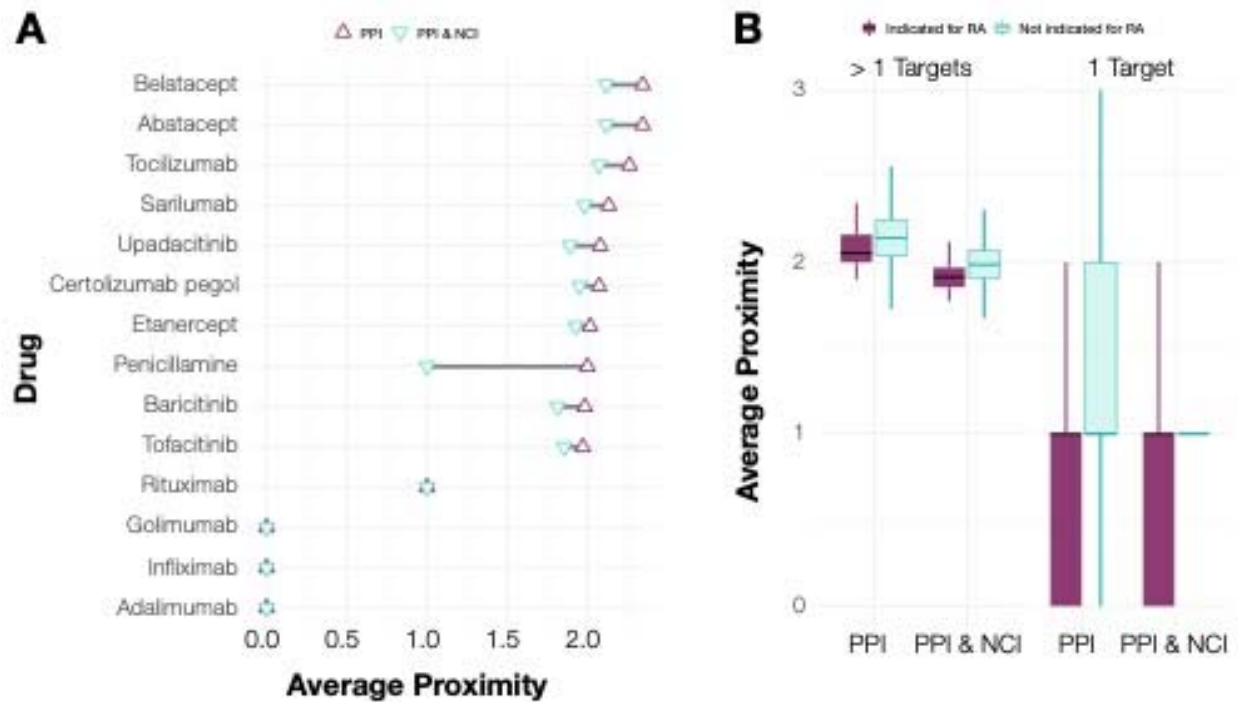

411  
 412 Figure S 10 **Average Proximity decreases for Rheumatoid Arthritis indicated drugs.** **A)** The dumbbell plot shows in the x-axis  
 413 the average proximity for 14 drugs indicated to treat RA. In purple, the PPI values for each disease and in turquoise the PPI &  
 414 NCI values. For all drugs with proximity higher than 1 we find that the PPI & NCI network decreases the distance of the drug-  
 415 targets to the disease module. **B)** Average proximity for drug-targets with more than 1 target is statistically significant smaller  
 416 for the PPI & NCI when compared to the PPI. The boxplots indicate a reduction on the proximity for drugs indicated to treat  
 417 RA.  
 418  
 419

420 **7 REFERENCES**

421 1. Hombach, S. & Kretz, M. Non-coding RNAs: Classification, biology and functioning. *Advances in Experimental*  
422 *Medicine and Biology* **937**, 3–17 (2016).  
423 2. Matera, A. G., Terns, R. M. & Terns, M. P. Non-coding RNAs: Lessons from the small nuclear and small nucleolar  
424 RNAs. *Nature Reviews Molecular Cell Biology* **8**, 209–220 (2007).  
425 3. Hammond, S. M., Caudy, A. A. & Hannon, G. J. Post-transcriptional gene silencing by double-stranded RNA. *Nature*  
426 *Reviews Genetics* **2001 2:2**, 110–119 (2001).  
427 4. John, B. *et al.* Human microRNA targets. *PLoS Biology* **2**, 661–663 (2004).  
428 5. Pillai, R. S., Bhattacharyya, S. N. & Filipowicz, W. *Repression of protein synthesis by miRNAs: how many mechanisms?*  
429 *Trends in Cell Biology* **17**, 118–126 (Elsevier Current Trends, 2007).  
430 6. Cui, C. & Cui, Q. The relationship of human tissue microRNAs with those from body fluids. *Scientific Reports* **10**, 1–7  
431 (2020).  
432 7. Zhuo, Y., Gao, G., Shi, J. an, Zhou, X. & Wang, X. MiRNAs: Biogenesis, origin and evolution, functions on virus-host  
433 interaction. *Cellular Physiology and Biochemistry* **32**, 499–510 (2013).  
434 8. Lewis, B. P., Burge, C. B. & Bartel, D. P. *Conserved seed pairing, often flanked by adenosines, indicates that thousands of*  
435 *human genes are microRNA targets.* *Cell* **120**, 15–20 (2005).  
436 9. Lewis, B. P., Shih, I. H., Jones-Rhoades, M. W., Bartel, D. P. & Burge, C. B. Prediction of Mammalian MicroRNA  
437 Targets. *Cell* **115**, 787–798 (2003).  
438 10. Grimson, A. *et al.* MicroRNA Targeting Specificity in Mammals: Determinants beyond Seed Pairing. *Molecular Cell* **27**,  
439 91–105 (2007).  
440 11. Kudla, G., Granneman, S., Hahn, D., Beggs, J. D. & Tollervey, D. Cross-linking, ligation, and sequencing of hybrids  
441 reveals RNA-RNA interactions in yeast. *Proceedings of the National Academy of Sciences of the United States of*  
442 *America* **108**, 10010–10015 (2011).  
443 12. Martin, M. M. *et al.* The human angiotensin II type 1 receptor +1166 A/C polymorphism attenuates microRNA-155  
444 binding. *Journal of Biological Chemistry* **282**, 24262–24269 (2007).  
445 13. Zhao, Y., Samal, E. & Srivastava, D. Serum response factor regulates a muscle-specific microRNA that targets Hand2  
446 during cardiogenesis. *Nature* **436**, 214–220 (2005).  
447 14. Martinez, N. J. & Walhout, A. J. M. The interplay between transcription factors and microRNAs in genome-scale  
448 regulatory networks. *BioEssays* **31**, 435–445 (2009).  
449 15. Ghafouri-Fard, S. *et al.* The interaction between miRNAs/lncRNAs and nuclear factor-κB (NF-κB) in human disorders.  
450 *Biomedicine and Pharmacotherapy* **138**, 111519 (2021).  
451 16. Mattes, J., Collison, A., Plank, M., Phipps, S. & Foster, P. S. Antagonism of microRNA-126 suppresses the effector  
452 function of T H2 cells and the development of allergic airways disease. *Proceedings of the National Academy of*  
453 *Sciences of the United States of America* **106**, 18704–18709 (2009).  
454 17. Topol, A. *et al.* Dysregulation of miRNA-9 in a Subset of Schizophrenia Patient-Derived Neural Progenitor Cells. *Cell*  
455 *Reports* **15**, 1024–1036 (2016).  
456 18. Kutsche, L. K. *et al.* Combined Experimental and System-Level Analyses Reveal the Complex Regulatory Network of  
457 miR-124 during Human Neurogenesis. *Cell Systems* **7**, 1–15 (2018).  
458 19. Huang, X. & Wong, G. *An old weapon with a new function: PIWI-interacting RNAs in neurodegenerative diseases.*  
459 *Translational Neurodegeneration* **10**, (BioMed Central, 2021).  
460 20. Wang, J. *et al.* PiRBase: A comprehensive database of piRNA sequences. *Nucleic Acids Research* **47**, D175–D180 (2019).  
461 21. Kutter, C. & Svoboda, P. miRNA, siRNA, piRNA: Knowns of the unknown. *RNA Biology* **5**, 181–188 (2008).  
462 22. Hu, B. *et al.* Therapeutic siRNA: state of the art. *Signal Transduction and Targeted Therapy* **5**, (2020).  
463 23. Zhang, M. M., Bahal, R., Rasmussen, T. P., Manautou, J. E. & Zhong, X. bo. The growth of siRNA-based therapeutics:  
464 Updated clinical studies. *Biochemical Pharmacology* **189**, (2021).  
465 24. D, B.-S. *et al.* siRNA-based identification of IBD-related targets in human monocyte-derived dendritic cells. *Journal of*  
466 *immunological methods* **494**, (2021).  
467 25. Moreno-Montañés, J. *et al.* siRNA therapeutics in ocular diseases. in *Methods in Molecular Biology* **2282**, 417–442  
468 (Methods Mol Biol, 2021).  
469 26. MM, Z., R, B., TP, R., JE, M. & XB, Z. The growth of siRNA-based therapeutics: Updated clinical studies. *Biochemical*  
470 *pharmacology* **189**, (2021).  
471 27. Dahariya, S. *et al.* Long non-coding RNA: Classification, biogenesis and functions in blood cells. *Molecular Immunology*  
472 **112**, 82–92 (2019).  
473 28. Ferrè, F., Colantoni, A. & Helmer-Citterich, M. Revealing protein–lncRNA interaction. *Briefings in Bioinformatics* **17**,  
474 106–116 (2016).

- 475 29. Tian, D., Sun, S. & Lee, J. T. The long noncoding RNA, Jpx, is a molecular switch for X chromosome inactivation. *Cell*  
476 **143**, 390–403 (2010).
- 477 30. Lee, J. T. Lessons from X-chromosome inactivation: Long ncRNA as guides and tethers to the epigenome. *Genes and*  
478 *Development* **23**, 1831–1842 (2009).
- 479 31. Lyle, R. *et al.* The imprinted antisense RNA at the *Igf2r* locus overlaps but does not imprint *Mas1*. *Nature Genetics* **25**,  
480 19–21 (2000).
- 481 32. Williamson, C. M. *et al.* Uncoupling antisense-mediated silencing and DNA methylation in the imprinted *Gnas* cluster.  
482 *PLoS Genetics* **7**, (2011).
- 483 33. Zhu, J. J., Fu, H. J., Wu, Y. G. & Zheng, X. F. Function of lncRNAs and approaches to lncRNA-protein interactions.  
484 *Science China Life Sciences* **56**, 876–885 (2013).
- 485 34. Wang, X. *et al.* Induced ncRNAs allosterically modify RNA-binding proteins in cis to inhibit transcription. *Nature* **454**,  
486 126–130 (2008).
- 487 35. Geisler, S. & Collier, J. RNA in unexpected places: Long non-coding RNA functions in diverse cellular contexts. *Nature*  
488 *Reviews Molecular Cell Biology* **14**, 699–712 (2013).
- 489 36. Rinn, J. L. *et al.* Functional Demarcation of Active and Silent Chromatin Domains in Human HOX Loci by Noncoding  
490 RNAs. *Cell* **129**, 1311–1323 (2007).
- 491 37. Wang, K. C. *et al.* A long noncoding RNA maintains active chromatin to coordinate homeotic gene expression. *Nature*  
492 **472**, 120–126 (2011).
- 493 38. Cesana, M. *et al.* A long noncoding RNA controls muscle differentiation by functioning as a competing endogenous  
494 RNA. *Cell* **147**, 358–369 (2011).
- 495 39. Chen, Y., Li, Z., Chen, X. & Zhang, S. *Long non-coding RNAs: From disease code to drug role*. *Acta Pharmaceutica Sinica*  
496 *B* **11**, 340–354 (Chinese Academy of Medical Sciences, 2021).
- 497 40. Li, C. H. & Chen, Y. Targeting long non-coding RNAs in cancers: Progress and prospects. *International Journal of*  
498 *Biochemistry and Cell Biology* **45**, 1895–1910 (2013).
- 499 41. Wu, P. *et al.* Roles of long noncoding RNAs in brain development, functional diversification and neurodegenerative  
500 diseases. *Brain Research Bulletin* **97**, 69–80 (2013).
- 501 42. Hellman, L. M. & Fried, M. G. Electrophoretic mobility shift assay (EMSA) for detecting protein-nucleic acid  
502 interactions. *Nature Protocols* **2**, 1849–1861 (2007).
- 503 43. Wang, W., Caldwell, M. C., Lin, S., Furneaux, H. & Gorospe, M. HuR regulates cyclin A and cyclin B1 mRNA stability  
504 during cell proliferation. *EMBO Journal* **19**, 2340–2350 (2000).
- 505 44. Günzl, A., Palfi, Z. & Bindereif, A. Analysis of RNA-protein complexes by oligonucleotide-targeted RNase H digestion.  
506 *Methods* **26**, 162–169 (2002).
- 507 45. Shih, J. D., Waks, Z., Kedersha, N. & Silver, P. A. Visualization of single mRNAs reveals temporal association of  
508 proteins with microRNA-regulated mRNA. *Nucleic Acids Research* **39**, 7740–7749 (2011).
- 509 46. Fu, D. *et al.* Long non-coding RNA CRNDE regulates the growth and migration of prostate cancer cells by targeting  
510 microRNA-146a-5p. *Bioengineered* **12**, 2469–2479 (2021).
- 511 47. Karagkouni, D. *et al.* DIANA-LncBase v3: Indexing experimentally supported miRNA targets on non-coding  
512 transcripts. *Nucleic Acids Research* **48**, D101–D110 (2020).
- 513 48. Ma, L. *et al.* Lncbook: A curated knowledgebase of human long non-coding rnas. *Nucleic Acids Research* **47**, D128–  
514 D134 (2019).
- 515 49. Bhartiya, D. *et al.* LncRNome: A comprehensive knowledgebase of human long noncoding RNAs. *Database* **2013**,  
516 (2013).
- 517 50. Hsu, S. Da *et al.* MiRTarBase: A database curates experimentally validated microRNA-target interactions. *Nucleic*  
518 *Acids Research* (2011). doi:10.1093/nar/gkq1107
- 519 51. Huang, H. D. Y. *et al.* MiRTarBase 2020: Updates to the experimentally validated microRNA-target interaction  
520 database. *Nucleic Acids Research* **48**, D148–D154 (2020).
- 521 52. Xiao, F. *et al.* miRecords: An integrated resource for microRNA-target interactions. *Nucleic Acids Research* **37**, (2009).
- 522 53. Chang, L., Zhou, G., Soufan, O. & Xia, J. miRNet 2.0: network-based visual analytics for miRNA functional analysis and  
523 systems biology. *Nucleic acids research* **48**, W244–W251 (2020).
- 524 54. Teng, X. *et al.* NPInter v4.0: An integrated database of ncRNA interactions. *Nucleic Acids Research* **48**, D160–D165  
525 (2020).
- 526 55. Junge, A. *et al.* RAIN: RNA-protein association and interaction networks. *Database* **2017**, (2017).
- 527 56. Gong, J. *et al.* RISE: A database of RNA interactome from sequencing experiments. *Nucleic Acids Research* **46**, D194–  
528 D201 (2018).
- 529 57. Rehm, H. L. *et al.* ClinGen — The Clinical Genome Resource. *New England Journal of Medicine* (2015).  
530 doi:10.1056/nejmsr1406261
- 531 58. Landrum, M. J. *et al.* ClinVar: Improvements to accessing data. *Nucleic Acids Research* (2020). doi:10.1093/nar/gkz972
- 532 59. Davis, A. P. *et al.* Comparative Toxicogenomics Database (CTD): update 2021. *Nucleic Acids Research* (2020).

533 doi:10.1093/nar/gkaa891

534 60. Zhang, G. *et al.* DiseaseEnhancer: A resource of human disease-associated enhancer catalog. *Nucleic Acids Research* **46**, D78–D84 (2018).

535

536 61. Piñero, J. *et al.* The DisGeNET knowledge platform for disease genomics: 2019 update. *Nucleic Acids Research* (2020). doi:10.1093/nar/gkz1021

537

538 62. Piñero, J. *et al.* DisGeNET: A comprehensive platform integrating information on human disease-associated genes and variants. *Nucleic Acids Research* **45**, D833–D839 (2017).

539

540 63. Buniello, A. *et al.* The NHGRI-EBI GWAS Catalog of published genome-wide association studies, targeted arrays and summary statistics 2019. *Nucleic Acids Research* (2019). doi:10.1093/nar/gky1120

541

542 64. Huang, Z. *et al.* HMDD v3.0: A database for experimentally supported human microRNA-disease associations. *Nucleic Acids Research* (2019). doi:10.1093/nar/gky1010

543

544 65. Bao, Z. *et al.* LncRNADisease 2.0: An updated database of long non-coding RNA-associated diseases. *Nucleic Acids Research* (2019). doi:10.1093/nar/gky905

545

546 66. Chen, G. *et al.* LncRNADisease: A database for long-non-coding RNA-associated diseases. *Nucleic Acids Research* (2013). doi:10.1093/nar/gks1099

547

548 67. Fokkema, I. F. A. C. *et al.* LOVD v.2.0: The next generation in gene variant databases. *Human Mutation* **32**, 557–563 (2011).

549

550 68. McKusick, V. A. Mendelian Inheritance in Man and its online version, OMIM. *American Journal of Human Genetics* (2007). doi:10.1086/514346

551

552 69. Ramos, E. M. *et al.* Phenotype-genotype integrator (PheGenI): Synthesizing genome-wide association study (GWAS) data with existing genomic resources. *European Journal of Human Genetics* **22**, 144–147 (2014).

553

554 70. Gutierrez-Sacristan, A. *et al.* PsyGeNET: a knowledge platform on psychiatric disorders and their genes. *Bioinformatics* **31**, 3075 (2015).

555

556 71. Barabási, A.-L. *Network Science*. (Cambridge University Press, 2016).

557

558 72. Gysi, D. M. & Nowick, K. Construction, comparison and evolution of networks in life sciences and other disciplines. *Journal of the Royal Society Interface* **17**, 20190610 (2020).

559

560 73. Langfelder, P. & Horvath, S. WGCNA: an R package for weighted correlation network analysis. *BMC Bioinformatics* **9**, 559 (2008).

561

562 74. Gysi, D. M., Voigt, A., Fragoso, T. de M., Almaas, E. & Nowick, K. wTO: an R package for computing weighted topological overlap and a consensus network with integrated visualization tool. *BMC Bioinformatics* **19**, 392 (2018).

563

564 75. Nowick, K., Gernat, T., Almaas, E. & Stubbs, L. Differences in human and chimpanzee gene expression patterns define an evolving network of transcription factors in brain. *Proceedings of the National Academy of Sciences* **106**, 22358–22363 (2009).

565

566 76. Ardlie, K. G. *et al.* The Genotype-Tissue Expression (GTEx) pilot analysis: Multitissue gene regulation in humans. *Science* **348**, 648–660 (2015).

567

568 77. Wishart, D. S. *et al.* DrugBank 5.0: A major update to the DrugBank database for 2018. *Nucleic Acids Research* (2018). doi:10.1093/nar/gkx1037

569

570 78. Singerman, L. Combination therapy using the small interfering RNA bevasiranib. *Retina* **29**, (2009).

571

572 79. Ray, K. K. *et al.* Two Phase 3 Trials of Inclisiran in Patients with Elevated LDL Cholesterol. *New England Journal of Medicine* **382**, 1507–1519 (2020).

573
